# Supplementary material for: Determination of bisulfite in food using the Etch-Cu-HCF nanozyme with enhanced polyphenol oxidase-like activity
Source: Royal Society of Chemistry journal article supplement (doi:10.1039/d3nj04547a), 2024-01-01
Supplement: d3nj04547a1.pdf [file d3nj04547a1.pdf]

1  
2  
3  
4  
5  
6  
7  
8  
9  
10  
11  
12  
13  
14  
15  
16  
17  
18  
19  
20  
21  
22

## Electronic Supplementary Material

# Determination of bisulfite in food by Etch-Cu-HCF nanozyme with enhanced polyphenol oxidase-like activity

Luwei Wang<sup>a,#</sup>, Qi Cheng<sup>a,#</sup>, Jie Li<sup>a</sup>, Lulu Lei<sup>a</sup>, Hui Huang<sup>a,\*</sup>, Ling  
Zhang<sup>a</sup>, Yongxin Li<sup>b,\*</sup>

<sup>a</sup>College of Food Science and Engineering, Jilin University, Changchun 130062, China.

<sup>b</sup>Key Lab of Groundwater Resources and Environment of Ministry of Education, Key  
Lab of Water Resources and Aquatic Environment of Jilin Province, College of New  
Energy and Environment, Jilin University, Changchun 130021, China.

<sup>#</sup>Contributed equally.

<sup>\*</sup>Corresponding author.

E-mail address: huanghui@jlu.edu.cn.

E-mail address: liyongxin@jlu.edu.cn.

23       **Chemicals.** Copper sulfate pentahydrate ( $\text{CuSO}_4 \cdot 5\text{H}_2\text{O}$ ) was purchased from  
24 Xilong Scientific Co., Ltd. (Shantou, China). Ferrous cyanide trihydrate  
25 ( $\text{K}_4[\text{Fe}(\text{CN})_6] \cdot 3\text{H}_2\text{O}$ ) and citric acid monohydrate ( $\text{C}_6\text{H}_8\text{O}_7 \cdot \text{H}_2\text{O}$ ) were purchased at  
26 Beijing Beihua Fine Chemical Co., Ltd. (Beijing, China). 25-28% ammonia, 2,4-  
27 Dichlorophenol (2,4-DP), and 4-Aminoantipyrine (4-AP) were purchased by Aladdin  
28 Biochemical Technology Co., Ltd. (Shanghai, China). Other reagents were obtained  
29 from Sangon Biotech (Shanghai) Co., Ltd. (Shanghai, China). All chemicals were  
30 analytically pure grade and had not been further purified.

31       **Instrumentation.** Ultraviolet spectrophotometer (UV-8000S) from SHIMADZU  
32 (Japan) served to record the ultraviolet absorption spectra; the PHS-3C pH meter with  
33 an E-201F electrode of Chengdu Reach Analytical Control Instrument Company is used  
34 to detect the pH of solutions; X diffraction spectrometer (D8 advance) was purchased  
35 from Bru (Beijing) Technology Co., Ltd. to record XRD spectra; Fourier near-infrared  
36 spectrometer (IRPRESTIGE-21) was purchased from SHIMADZU (Japan) to record  
37 IR spectra.

38       **Synthesis of Cu-HCF nanozyme.** Copper Prussian blue analogs were synthesized  
39 by adjusting according to the literature.<sup>S1</sup> 0.1 mmol potassium ferricyanide  
40 monohydrate and 0.3 g citric acid monohydrate were dispersed in 20 mL of water as  
41 solution A, and 0.2 mmol copper sulfate pentahydrate was dispersed in 10 mL of water  
42 as solution B. Solution B was then added dropwise to solution A while stirring  
43 vigorously with a magnetic rotor and kept stirring for 24 h after the end of the dropwise  
44 addition. The reaction products were collected by centrifugation at 10000 rpm/min for

45 5 min, and washed with pure water three times, and the copper Prussian blue analogue  
46 Cu-HCF was dispersed. The Cu-HCF nanozyme was dispersed in pure water and stored  
47 in a refrigerator at 4 °C.

48 **Study of ammonia erosion time on the polyphenol oxidase-like activity of**  
49 **Etch-Cu-HCF nanozyme.** In this experiment, 0.4 mL of deionized water, 0.3 mL of  
50 Tris-HCl buffer (100 mM, pH 8.5), 0.1 mL of 2,4-DP (0.1 mg/mL), and 0.1 mL of 4-  
51 AP (1 mg/mL) were added sequentially. Finally, 0.1 mL of Etch-Cu-HCF nanozyme  
52 (0.1 mg/mL) with different erosion times (0, 0.5, 1, 2, 3 h) were added to form different  
53 reaction systems. These different reaction systems were reacted at 25 °C for 1 h, and  
54 then the UV absorbance values at 510 nm were measured and recorded.

55 **Optimization of experimental conditions for the detection of sulfite ions by**  
56 **Etch-Cu-HCF nanozyme.** The detection of bisulfite by Etch-Cu-HCF nanozyme was  
57 divided into three steps. The pH and temperature were optimized for each step  
58 separately.

59 Temperature optimization for the first step. In a typical reaction, Tris-HCl (100  
60 mM, pH 8.5, 0.3 mL), deionized water (0.37 mL), Etch-Cu-HCF nanozyme (1 mg/mL,  
61 0.03 mL), 2,4-DP (0.05 mg/mL, 0.1 mL) and 4-AP (1 mg/mL, 0.1 mL) were added  
62 sequentially to centrifuge tubes at 30, 40, 50, 60 and 70°C incubated for 30 min. The  
63 UV absorbance values of these reaction systems at 510 nm were measured and  
64 recorded.

65 The reaction time optimization for the first step. In a typical reaction, Tris-HCl  
66 (100 mM, pH 8.5, 0.3 mL), deionized water (0.37 mL), Etch-Cu-HCF nanozyme (1

67 mg/mL, 0.03 mL), 2,4-DP (0.05 mg/mL, 0.1 mL) and 4-AP (1 mg/mL, 0.1 mL). The  
68 UV absorption values at 510 nm for the above reactions were measured and recorded  
69 at 40 °C for 10, 20, 30, 40, and 50 min.

70 Temperature optimization for the second reaction step. Tris-HCl (100 mM, pH  
71 8.5, 0.3 mL), deionized water (0.37 mL), Etch-Cu-HCF nanozyme (1 mg/mL, 0.03 mL),  
72 and 2,4-DP (0.05 mg/mL, 0.1 mL) were reacted at 40°C for 30 min, followed by the  
73 addition of sodium bisulfite (250 µM, 0.1 mL) and incubated at 25, 30, 40, 50 and 60  
74 °C for 10 min, followed by the addition of 4-AP (1 mg/mL, 0.1 mL) and incubation at  
75 room temperature for 1 h. The UV absorption values of the reaction system at 510 nm  
76 were then measured and recorded.

77 The reaction time optimization for the second step. Tris-HCl (100 mM, pH 8.5,  
78 0.3 mL), deionized water (0.37 mL), Etch-Cu-HCF nanozyme (1 mg/mL, 0.03 mL),  
79 and 2,4-DP (0.05 mg/mL, 0.1 mL) were sequentially added to centrifuge tubes and kept  
80 at 40 °C for 30 min. Subsequently, sodium bisulfite (250 µM, 0.1 mL) was added and  
81 kept at 25 °C for 10, 20, 30, 40, and 50 min, then 4-AP (1 mg/mL, 0.1 mL) was added  
82 and kept at room temperature for 1 h. The UV absorption values of the reaction system  
83 at 510 nm were then measured and recorded.

84 Temperature optimization for the third step. Tris-HCl (100 mM, pH 8.5, 0.3 mL),  
85 deionized water (0.37 mL), Etch-Cu-HCF nanozyme (1 mg/mL, 0.03 mL), 2,4-DP  
86 (0.05 mg/mL, 0.1 mL) were added sequentially to the centrifuge tube and reacted at 40  
87 °C for 30 min. Then sodium bisulfite (250 µM, 0.1 mL) was added and kept at 25 °C  
88 for 10 min, and 4-AP (1 mg/mL, 0.1 mL) was added and kept at 25, 30, 40, 50, and 60

89 °C for 1 h. The UV absorbance values at 510 nm of the reaction system were then  
90 measured and recorded.

91 The reaction time optimization for the third step. Tris-HCl (100 mM, pH 8.5, 0.3  
92 mL), deionized water (0.37 mL), Etch-Cu-HCF nanozyme (1 mg/mL, 0.03 mL), 2,4-  
93 DP (0.05 mg/mL, 0.1 mL) were added sequentially to the centrifuge tube and reacted  
94 at 40 °C for 30 min, and then Sodium bisulfite (250 μM, 0.1 mL) was added and kept  
95 at 25 °C for 10 min, then 4-AP (1 mg/mL, 0.1 mL) was added and kept at 25 °C for 40,  
96 60, 80, 100 and 120 min, respectively. The UV absorbance values at 510 nm of the  
97 reaction system were then measured and recorded.

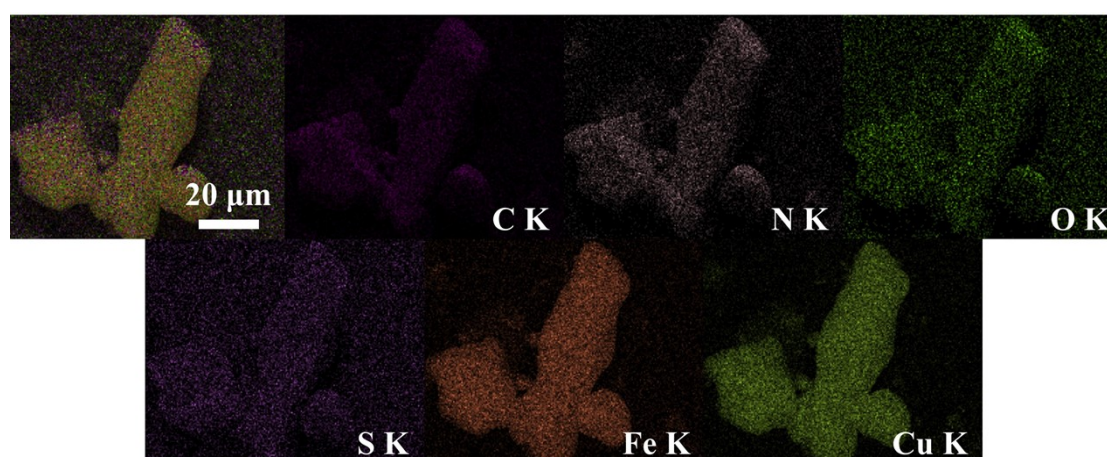

99 **Figure S1.** Elemental distribution of the Cu-HCF nanozyme.

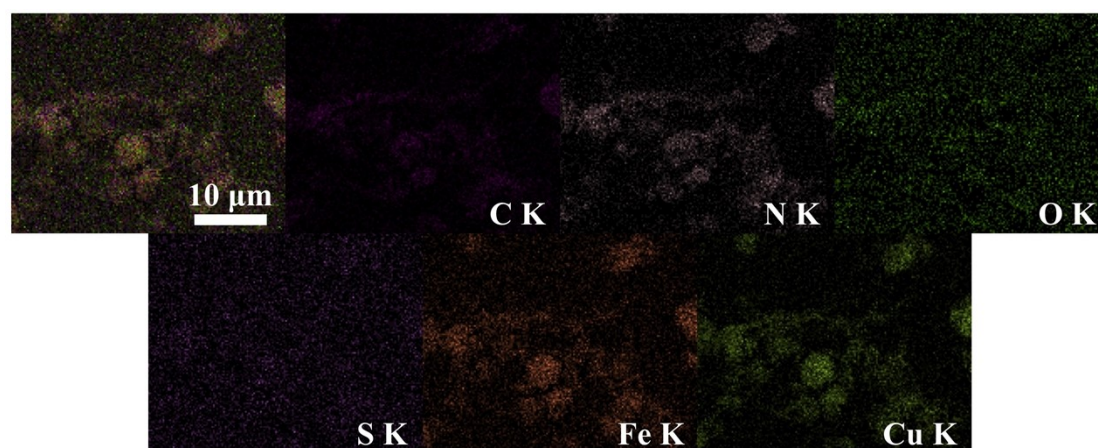

101 **Figure S2.** Elemental distribution of the Etch-Cu-HCF nanozyme.

102 **Table S1.** Results of the Elemental Content in Samples Analyzed by ICP-OES.

| Elemental Content (mg/L) |         |        |        |             |
|--------------------------|---------|--------|--------|-------------|
| Samples                  | K       | Cu     | Fe     | Cu/Fe ratio |
| Cu-HCF                   | 20.6773 | 5.9915 | 2.6308 | 2.3         |
| Etch-Cu-HCF              | 5.7309  | 1.2502 | 0.3493 | 3.6         |

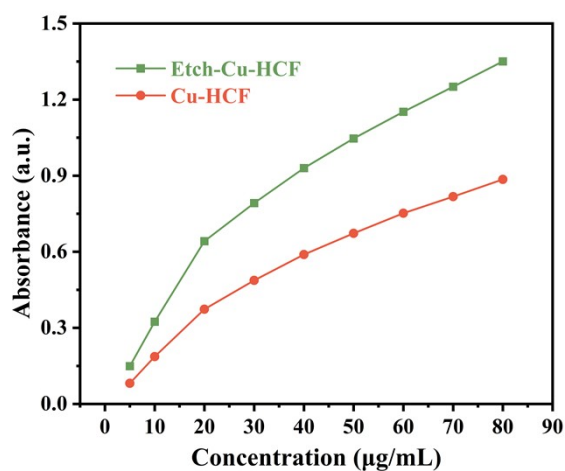

103

104 **Figure S3.** Comparison of the polyphenol oxidase-like activity of Etch-Cu-HCF

105 nanozyme and Cu-HCF nanozyme by varying the catalyst concentration for the same

106 reaction time.

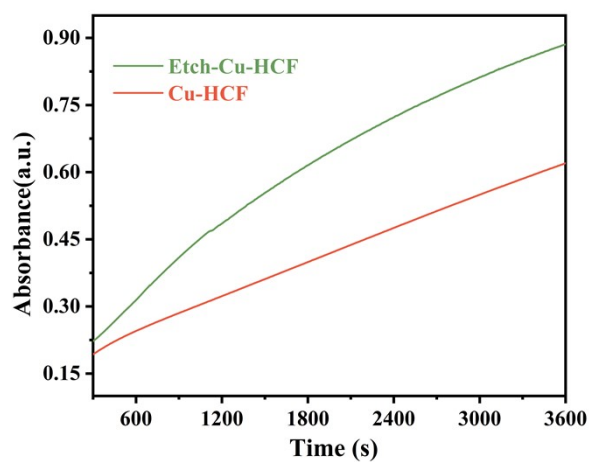

107

108 **Figure S4.** Comparison of the polyphenol oxidase-like activity of Etch-Cu-HCF

109 nanozyme and Cu-HCF nanozyme by varying the reaction time with the same catalyst  
 110 concentration.

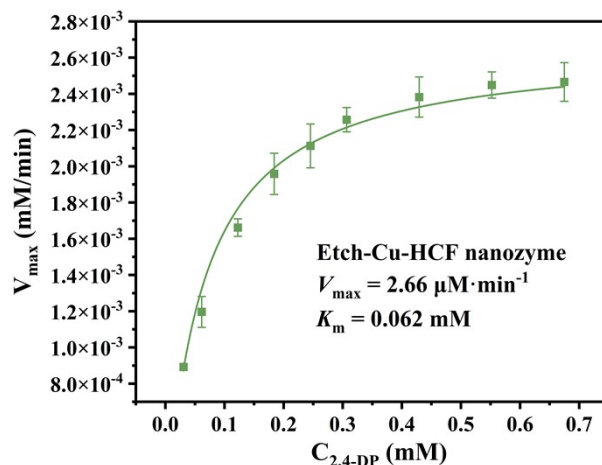

111

112 **Figure S5.** Reaction kinetics of Etch-Cu-HCF nanozyme.

113 **Table S2.** Comparison of kinetic parameters of polyphenol oxidase-like activity of  
 114 Etch-Cu-HCF with other catalysts.

| Catalysts   | $K_m$ (mM) | $V_{max}$ ( $\mu\text{M min}^{-1}$ ) | Reference |
|-------------|------------|--------------------------------------|-----------|
| Cu-Cys NLs  | 0.14       | 1.44                                 | [S2]      |
| Ce-MOF-808  | 0.13       | 2.22                                 | [S3]      |
| Cu FMA      | 0.45       | 3.43                                 | [S4]      |
| BSA-Cu      | 0.12       | 4.00                                 | [S5]      |
| Bpy-Cu      | 0.19       | 1.48                                 | [S6]      |
| CH-Cu       | 0.42       | 7.30                                 | [S7]      |
| Cu-HCF      | 0.06       | 1.33                                 | [S8]      |
| Natural PPO | 0.40       | 2.34                                 | [S8]      |
| Etch-Cu-HCF | 0.06       | 2.66                                 | This work |

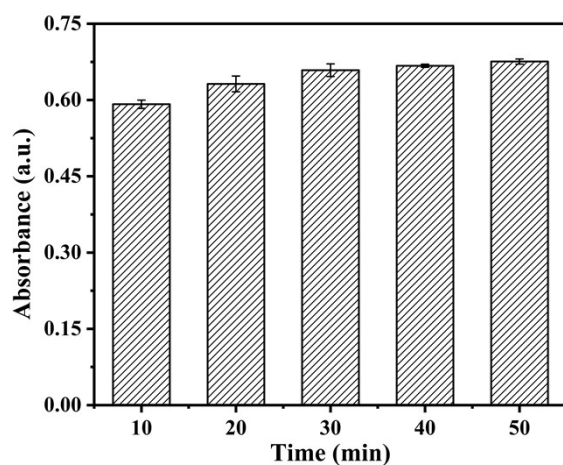

115

116 **Figure S6.** First step reaction time optimization for detecting bisulfite.

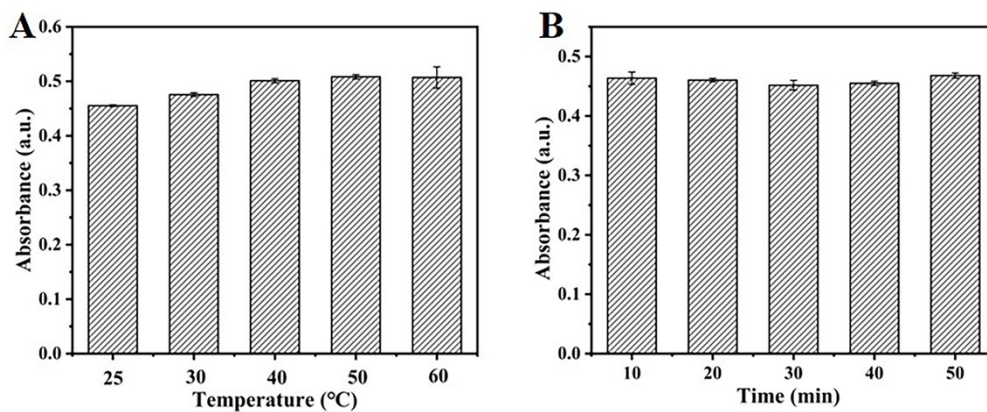

117

118 **Figure S7.** Optimization of the second step of the detection of bisulfite. (A)

119 Temperature. (B) Time.

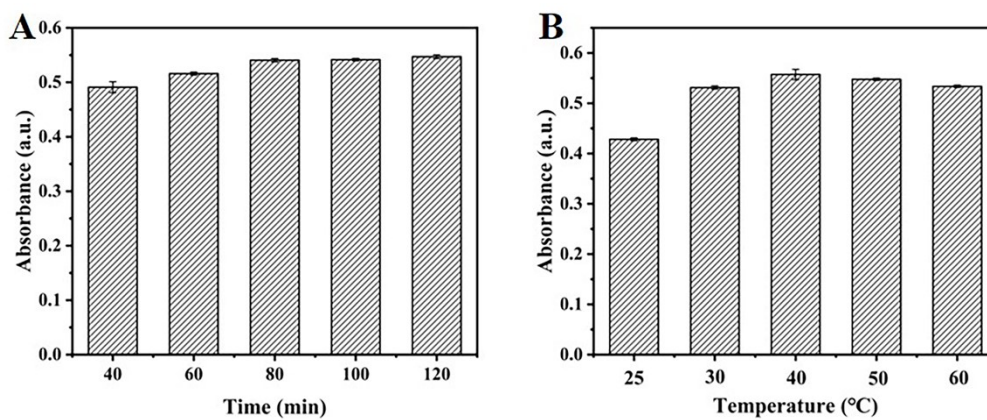

120

121 **Figure S8.** Optimization of the third step of the detection of bisulfite. (A) Time. (B)

122 Temperature.



123 **Table S3.** Comparison of different sensors for bisulfite.

| Sensor                   | Analytical method  | Linear range<br>( $\mu\text{M}$ ) | LOD<br>( $\mu\text{M}$ ) | References |
|--------------------------|--------------------|-----------------------------------|--------------------------|------------|
| CoHCF/BLPE               | Electrochemistry   | 4-128                             | 1.74                     | [S9]       |
| Probe 1                  | Fluorescence       | 10-150                            | 0.37                     | [S10]      |
| Ir1@MSNs-NH <sub>2</sub> | Phosphorescence    | 10-140                            | 0.80                     | [S11]      |
| CM-BA                    | Spectrofluorometry | 10-35                             | 0.11                     | [S12]      |
| ASHTI                    | Spectrofluorometry | 0-60                              | 0.27                     | [S13]      |
| CyR                      | Spectrophotometry  | 10-160                            | 11.50                    | [S14]      |
| Etch-Cu-HCF              | Spectrophotometry  | 0-50                              | 0.47                     | This work  |
| Paper sensor             | Smartphone Photo   | 0-50                              | 1.67                     | This work  |

124 **Supplemental references**

- 125 S1. D. Wang, H. Wu, C. Wang, L. Gu, H. Chen, D. Jana, L. Feng, J. Liu, X. Wang,  
 126 P. Xu, Z. Guo, Q. Chen and Y. Zhao, *Angewandte Chemie-International*  
 127 *Edition*, 2021, **60**, 3001-3007.
- 128 S2. M. Guan, M. Wang, W. Qi, R. Su and Z. He, *Front. Chem. Sci. Eng.*, 2021, **15**,  
 129 310-318.
- 130 S3. S. Liang, X.-L. Wu, J. Xiong, X. Yuan, S.-L. Liu, M.-H. Zong and W.-Y. Lou,  
 131 *Chem. Eng. J.*, 2022, **450**, DOI: 10.1016/j.cej.2022.138220.
- 132 S4. M. Ying, G. Yang, Y. Xu, H. Ye, X. Lin, Y. Lu, H. Pan, Y. Bai and M. Du,  
 133 *Analyst*, 2021, **147**, 40-47.
- 134 S5. S. Rashtbari and G. Dehghan, *J. Hazard. Mater.*, 2021, **406**, DOI:  
 135 10.1016/j.jhazmat.2020.124340.
- 136 S6. M. Li, Y. Xie, L. Lei, H. Huang and Y. Li, *Sens. Actuators, B*, 2022, **357**, DOI:

- 137 10.1016/j.snb.2022.131429.
- 138 S7. J. Wang, R. Huang, W. Qi, R. Su, B. P. Binks and Z. He, *Appl. Catal., B*, 2019,  
139 **254**, 452-462.
- 140 S8. Q. Cheng, L. Zhang, L. Lei, H. Huang and Y. Li, *Anal. Lett.*, 2023, **56**, 2137-  
141 2151.
- 142 S9. S. Devaramani, P. S. Adarakatti and P. Malingappa, *Electrochim. Acta*, 2017,  
143 **231**, 650-658.
- 144 S10. D. Li, X. Tian, Z. Li, J. Zhang and X. Yang, *J. Agric. Food Chem.*, 2019, **67**,  
145 3062-3067.
- 146 S11. X. Li, R. Zeng, C. Xie, D. Tang, Q. Li, B. Zhang and T. Huang, *Dyes Pigm.*,  
147 2019, **165**, 128-136.
- 148 S12. X. He, W. Xu, F. Ding, C. Xu, Y. Li, H. Chen and J. Shen, *J. Agric. Food Chem.*,  
149 2020, **68**, 11774-11781.
- 150 S13. L. Zou, J. Xu, X. Liu, X. Zhang, Y. Gao, G. Zhang and X. Duan, *Microchem. J.*,  
151 2020, **153**, DOI: 10.1016/j.microc.2019.104461.
- 152 S14. E. Ozdemir, Y. Alcay, O. Yavuz, M. S. Yildirim, H. Aribuga, U. Ertugral, K.  
153 Kaya and I. Yilmaz, *Talanta*, 2023, **261**, DOI: 10.1016/j.talanta.2023.124660.
- 154
